# Supplementary material
Source: publisher site journal article supplement (https://www.dovepress.com/get_supplementary_file.php?f=337956.docx)
Supplement: Supplementary file 1 [file get_supplementary_file.php]

**Supplemental Table 1. Clinical manifestations in 10 patients with disseminated nontuberculous mycobacterial disease with osteolytic lesions.**

| **Symptom/****Sign** | **No.** | **Percentage (%)** |
| --- | --- | --- |
| General symptoms | | |
| Anemia | 10 | 100 |
| Fever | 7 | 70 |
| Emaciation | 7 | 70 |
| Night sweats | 3 | 30 |
| Respiratory symptoms | | |
| Cough and expectoration | 7 | 70 |
| Dyspnea | 4 | 40 |
| Stethalgia | 4 | 40 |
| Hemoptysis | 2 | 20 |
| Digestive tract symptoms | | |
| Anorexia | 6 | 60 |
| Nausea and vomiting | 3 | 30 |
| Abdominal pain and distension | 1 | 10 |
| Diarrhea | 1 | 10 |
| Bloody stool | 1 | 10 |
| Bone and joint symptoms | | |
| Ostealgia | 10 | 10 |
| Joint pain | 1 | 10 |
| Joint dysfunction | 1 | 10 |
| Signs | | |
| Subcutaneous nodules or abscesses | 7 | 70 |
| Lymphadenopathy | 6 | 60 |
| Rashes | 4 | 40 |
| Sinus | 4 | 40 |
| Pulmonary moist rales | 4 | 40 |
| Hepatosplenomegaly | 2 | 20 |

**Supplemental Table 2**. **Laboratory findings of 10 patients with disseminated nontuberculous mycobacterial disease with osteolytic lesions.**

| **Variable** | **P1** | **P2** | **P3** | **P4** | **P5** | **P6** | **P7** | **P8** | **P9** | **P10** | **Median (IQR)** |
| --- | --- | --- | --- | --- | --- | --- | --- | --- | --- | --- | --- |
| WBCs (×109/L) | 26.99 | 11.54 | 13.42 | 8.59 | 20.47 | 34.91 | 12.31 | 18.15 | 15.87 | 11.95 | 14.65 (11.85－22.1) |
| Neu (×109/L) | 24.5 | 9.92 | 10.97 | 6.25 | 16.8 | 32.5 | 8.32 | 13.84 | 12 | 8.74 | 11.49 (8.64－18.7) |
| ALC (×109/L) | 2 | 1.53 | 1.95 | 1.64 | 1.65 | 1.9 | 2.29 | 2.4 | 2 | 1.8 | 1.93 (1.65－2.07) |
| HGB (g/L) | 64 | 124 | 100 | 62.9 | 94 | 70.2 | 95 | 71.2 | 84 | 82 | 83 (68.65－96.25) |
| PLTs (×109/L) | 739 | 248 | 604 | 299 | 612.1 | 395 | 519 | 589.1 | 765 | 273 | 596.5 (371－727) |
| Albumin (g/L) | 23 | 40.8 | 23.5 | 24.8 | 27.8 | 32 | 35.8 | 26.2 | 32.9 | 31 | 29.4 (24.5－33.6) |
| Globulin (g/L) | 38.9 | 25.7 | 40 | 36.2 | 42.3 | 61.9 | 35.4 | 48 | 34.9 | 45.7 | 39.5 (35.2–46.2) |
| ALT (U/L) | 54.4 | 11 | 16.8 | 67.2 | 19.8 | 24.9 | 52.2 | 16.9 | 101 | 23.2 | 24.05 (16.88–57.6) |
| AST (U/L) | 117 | 13.2 | 45 | 46.9 | 22.6 | 25.5 | 33.2 | 17.6 | 17.1 | 22.2 | 24.05 (17.48－45.5) |
| TBiL (mmol/L) | 18 | 7.4 | 7.1 | 118 | 7.9 | 44.9 | 5.1 | 15 | 4.8 | 3.8 | 7.65 (5.03－24.73) |
| DBiL (mmol/L) | 6.2 | 2.9 | 2 | 5.7 | 4.2 | 34.7 | 2 | 4 | 4.1 | 2 | 4.05 (2－5.83) |
| CD4+ T cell count (cells/µL) | 200 | 702 | 354 | 164 | 511 | 139 | 511 | 627 | 601 | ND | 511 (182–614) |
| CD8+ T cell count (cells/µL) | 95 | 496 | 268 | 150 | 413 | 95 | 446 | 331 | 402 | ND | 331 (122.5–429.5) |
| CRP (mg/L) | 115 | 13.6 | 66.8 | 179.4 | 171.8 | 134 | 134.5 | 198.4 | 72.4 | ND | 134 (69.6–175.6) |
| ESR (mm/h) | 47 | 20 | 113 | 142 | 130 | 99 | 103 | 200 | 41 | 54 | 101 (45.5–133) |
| PCT (ng/L) | 3 | ND | ND | ND | 0.12 | ND | 0.35 | 0.49 | ND | ND | - |
| AIGAs (ng/mL) | 49166.2 | 9068.4 | 3565.2 | 4499.9 | 148468.9 | 24128.7 | 38311.7 | 75883.8 | 49489.6 | 2706.2 | 31220.2(4266.2–56088.2) |

NOTES: Data are presented as the numbers or medians (interquartile ranges); "-" indicates that the median was not calculated; Normal range: white blood cells: 3.5–9.5×109/L; neutrophils: 1.8–6.3×109/L; absolute lymphocyte count: 1.1–3.3×109/L; hemoglobin: 130–175 g/L; platelets: 125–350×109/L; albumin: 40.55 g/L; globulin: 20–40 g/L; alanine aminotransferase: 9–60 U/L; aspartate aminotransferase: 15–45 U/L; total bilirubin: 3.4–20.5 mmoL/L; direct bilirubin: 0–6.8 mmoL/L; CD4+ T cell count: 410–1590 cells/µL; CD8+ T cell count: 190–1140 cells/µL; C-reactive protein: 0–66.8 mmoL; erythrocyte sedimentation rate: 0–15 mm/L; CD8+ T cell count: 190–1140 cells/µL.

Abbreviations: ALC, absolute lymphocyte count; ALT, alanine aminotransferase; AST, aspartate aminotransferase; AIGAs, anti-IFN-γ autoantibodies; CRP, C-reactive protein; DBiL, direct bilirubin; ESR, erythrocyte sedimentation rate; HGB, hemoglobin; Neu, neutrophils; PLTs, platelets; PCT, procalcitonin; TBiL, total bilirubin; WBCs, white blood cells; ND, not done.

**Supplemental table 3.** **Antimicrobial susceptibility testing of nontuberculous mycobacteria isolates.**

| **No*** | **P1** | | | **P3** | | | **P4** | | | **P5** | | | **P6** | | | **P7** | | | **P8** | | | **P9** | | |
| --- | --- | --- | --- | --- | --- | --- | --- | --- | --- | --- | --- | --- | --- | --- | --- | --- | --- | --- | --- | --- | --- | --- | --- | --- |
| NTM species | M.kansasii | | | M.fortuitum | | | M.chelonae | | | M.intracellulare | | | M.avium complex | | | M.avium complex | | | M.abscessus | | | M.intermedium | | |
|  | S | I | R | S | I | R | S | I | R | S | I | R | S | I | R | S | I | R | S | I | R | S | I | R |
| Streptomycin | 0 | 0 | 1 | 0 | 0 | 1 | 0 | 0 | 1 | 0 | 0 | 1 | 0 | 0 | 1 | 0 | 0 | 1 | 0 | 0 | 1 | 0 | 0 | 1 |
| Ethambutol | 0 | 1 | 0 | 0 | 0 | 1 | 0 | 1 | 0 | 0 | 0 | 1 | 1 | 0 | 0 | 0 | 0 | 1 | 1 | 0 | 0 | 1 | 0 | 0 |
| Isoniazid | 0 | 0 | 1 | 0 | 1 | 0 | 0 | 0 | 1 | 0 | 0 | 1 | 0 | 0 | 1 | 0 | 0 | 1 | 0 | 0 | 1 | 0 | 1 | 0 |
| Rifampicin | 0 | 0 | 1 | 0 | 1 | 0 | 0 | 1 | 0 | 0 | 0 | 1 | 0 | 0 | 1 | 0 | 0 | 1 | 0 | 0 | 1 | 1 | 0 | 0 |
| Para-aminosalicylic acid | 0 | 0 | 1 | 0 | 0 | 1 | 0 | 0 | 1 | 0 | 0 | 1 | 0 | 0 | 1 | 0 | 0 | 1 | 0 | 0 | 1 | 0 | 0 | 1 |
| Levofloxacin | 0 | 0 | 1 | 1 | 0 | 0 | 0 | 1 | 0 | 0 | 0 | 1 | 1 | 0 | 0 | 0 | 0 | 1 | 0 | 0 | 1 | 0 | 0 | 1 |
| Capreomycin | 0 | 0 | 1 | 0 | 0 | 1 | 1 | 0 | 0 | 0 | 0 | 1 | 0 | 0 | 1 | 0 | 0 | 1 | 0 | 0 | 1 | 0 | 0 | 1 |
| Propylthioisoamide | 0 | 0 | 1 | 1 | 0 | 0 | 0 | 0 | 1 | 1 | 0 | 0 | 0 | 0 | 1 | 1 | 0 | 0 | 0 | 0 | 1 | 0 | 0 | 1 |
| Amikacin | 0 | 0 | 1 | 0 | 0 | 1 | 1 | 0 | 0 | 0 | 0 | 1 | 0 | 0 | 1 | 0 | 0 | 1 | 0 | 0 | 1 | 0 | 0 | 1 |

* Indicates the number of patients with drug susceptibility results (n=8). S: Susceptible; I: Intermediate; R: Resistant
